# Supplementary material
Source: PubMed Central journal article supplement (PMC2716985)
Supplement: ajpath.2009.090160_6.pdf [file ajpath.2009.090160_6.pdf]

Supplemental Table T1

**Supplemental Table T1: Summary of results**

|               | ApoE <sup>-/-</sup>                                                               | POVPC                                                                             | PGPC                                                                                |
|---------------|-----------------------------------------------------------------------------------|-----------------------------------------------------------------------------------|-------------------------------------------------------------------------------------|
| Cx43-T        |  |  | -                                                                                   |
| pS279/282     |  |  | -                                                                                   |
| pS368         |  | -                                                                                 |  |
| Proliferation |  |  | -                                                                                   |
