# Supplementary material
Source: PubMed Central journal article supplement (PMC2716985)

### Carotid Ligation

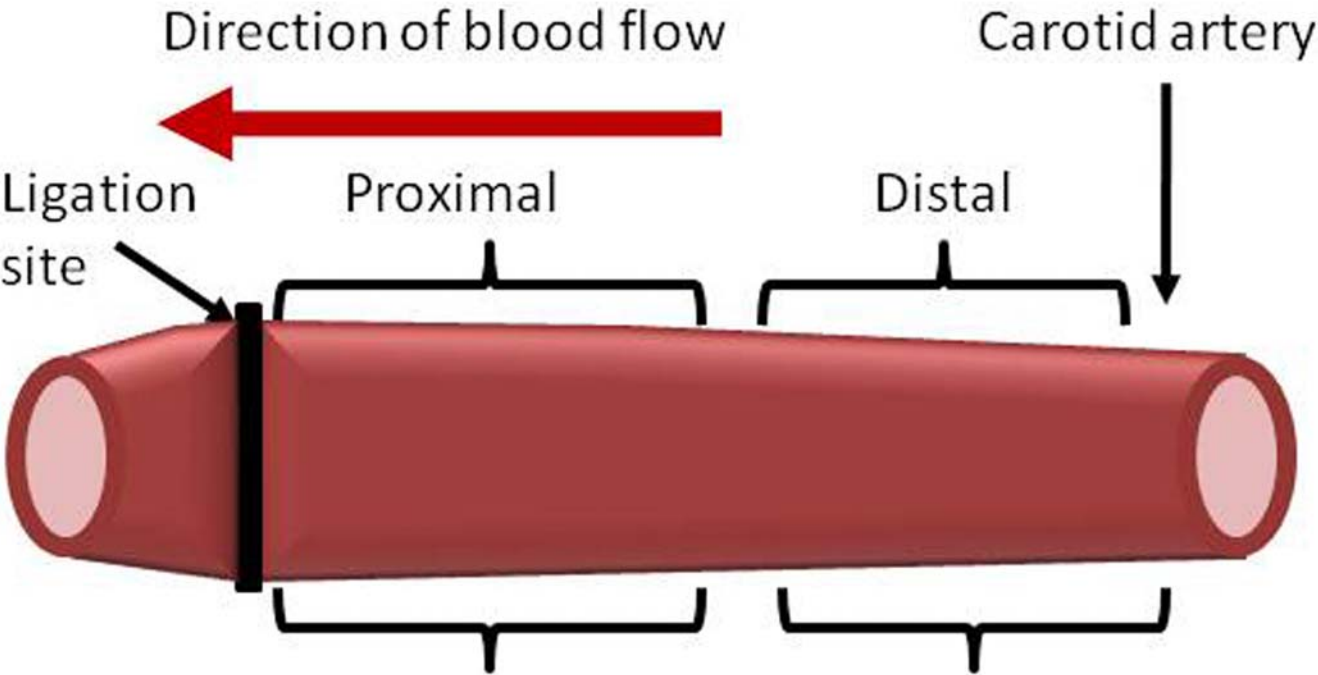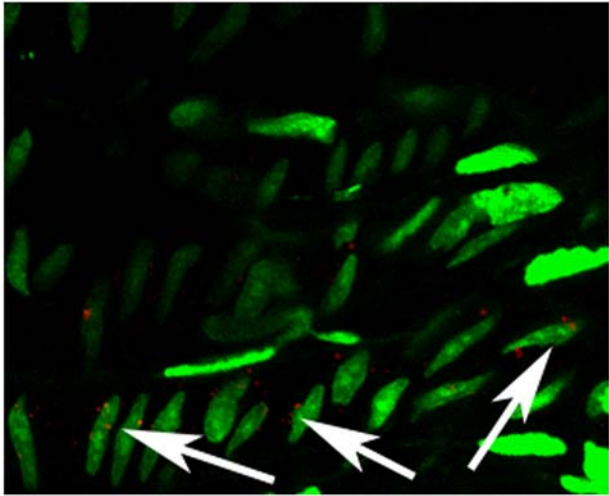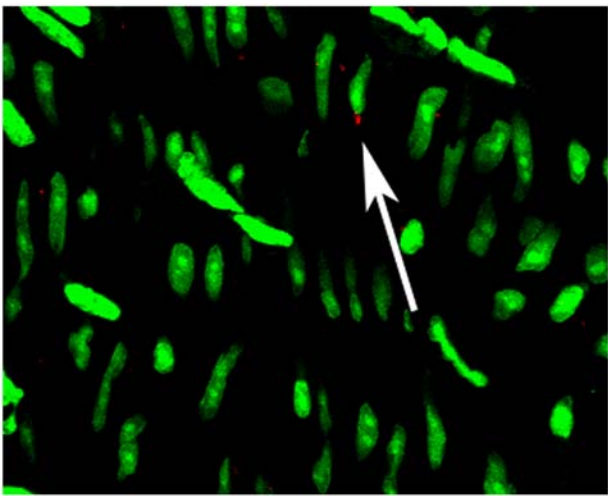

Supplement: ajpath.2009.090160_2.pdf [file ajpath.2009.090160_2.pdf]

Supplemental Figure S4

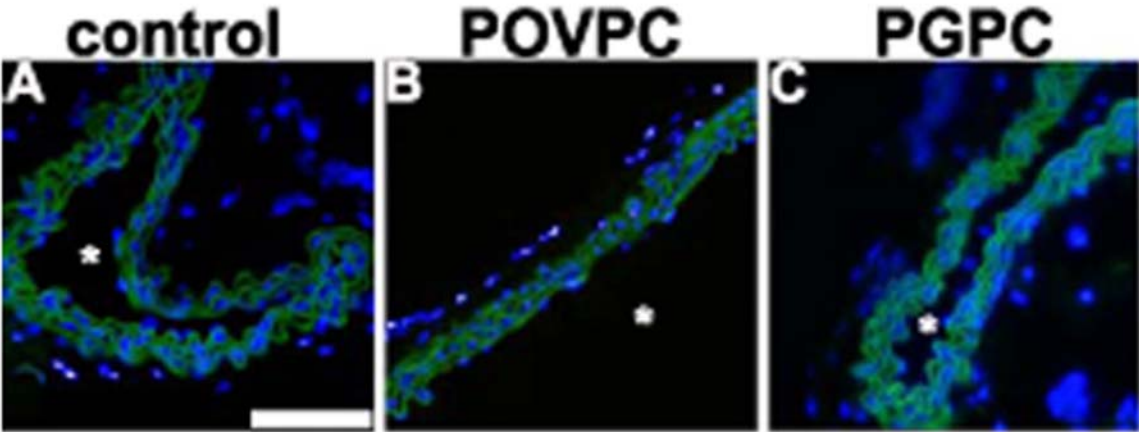

Supplement: ajpath.2009.090160_4.pdf [file ajpath.2009.090160_4.pdf]
